# Supplementary material for: An experimental and theoretical study of the gas phase kinetics of atomic chlorine reactions with CH3NH2, (CH3)2NH, and (CH3)3N
Source: Royal Society of Chemistry journal article supplement (doi:10.1039/c4cp03801k), 2014-11-11
Supplement: c4cp03801k1.pdf [file c4cp03801k1.pdf]

# An experimental and theoretical study of the gas phase kinetics of atomic chlorine reactions with $\text{CH}_3\text{NH}_2$ , $(\text{CH}_3)_2\text{NH}$ , and $(\text{CH}_3)_3\text{N}$

## Electronic Supplementary Information

J. Michael Nicovich,<sup>1</sup> Shriya Mazumder,<sup>1</sup> Patrick L. Laine,<sup>2a</sup> Paul H. Wine,<sup>1,2\*</sup> Yishen Tang,<sup>3</sup> Arne J. C. Bunkan,<sup>4</sup> and Claus J. Nielsen<sup>4\*</sup>

<sup>1</sup> School of Chemistry & Biochemistry, Georgia Institute of Technology, Atlanta, GA 30332-0400, USA. <sup>2</sup> School of Earth & Atmospheric Sciences, Georgia Institute of Technology, Atlanta, GA 30332-0340, USA. <sup>3</sup> School of Environmental and Municipal Engineering, Qingdao Technological University, Fushun Road 11. 266033 Qingdao, Shandong, P.R. China. <sup>4</sup> Department of Chemistry, University of Oslo, P.O.Box 1033 Blindern, 0316 Oslo, Norway.

**Table S1.** Experimental polarizabilities,  $\alpha$ , and the first ionisation potentials,  $I$ , used for calculating capture rates.<sup>a</sup>

|     | $\alpha/\text{\AA}^3$ | $I/\text{eV}$ |
|-----|-----------------------|---------------|
| MA  | 3.75                  | 8.90          |
| DMA | 5.45                  | 8.24          |
| TMA | 7.08                  | 7.85          |
| Cl  | 2.18                  | 12.97         |

<sup>a</sup> NIST Computational Chemistry Comparison and Benchmark Database. NIST Standard Reference Database Number 101, R. D. Johnson III, Release 16a, August 2013.

<http://cccbdb.nist.gov/>

<sup>a</sup> Present address: Portnoy Environmental Inc. (PEI), 1414 Sam Houston Parkway N., Suite 170, Houston, TX 77043, USA.

**Table S2: Kinetic Data for the reaction  $\text{Cl}(^2\text{P}_J) + \text{CH}_3\text{NH}_2 \rightarrow \text{products (R1)}$  <sup>a</sup>**

| $T$         | $P$            | # exp <sup>b</sup> | $[\text{Cl}_2\text{CO}]$ | $[\text{Cl}]_0$ | $[\text{CH}_3\text{NH}_2]_{\text{max}}$ | $k_{\text{max}}$ | $k_{\text{R1}} \pm 2\sigma$ <sup>c</sup> |
|-------------|----------------|--------------------|--------------------------|-----------------|-----------------------------------------|------------------|------------------------------------------|
| 298         | 25             | 6                  | 393–1360                 | 6.9             | 784                                     | 24500            | $3.14 \pm 0.52$                          |
| 298         | 25             | 6                  | 1440                     | 1.2             | 448                                     | 13600            | $2.97 \pm 0.25$                          |
| 297         | 26             | 5                  | 355                      | 4.2             | 406                                     | 11500            | $2.82 \pm 0.45$                          |
| 297         | 26             | 5                  | 395                      | 2.6             | 522                                     | 16200            | $2.95 \pm 0.35$                          |
| 297         | 26             | 5                  | 181                      | 1.8             | 572                                     | 18600            | $3.13 \pm 0.38$                          |
| 297         | 25             | 11                 | 1250                     | 0.84–3.4        | 689                                     | 19800            | $2.92 \pm 0.12$                          |
| 296         | 25             | 7                  | 665                      | 5.1             | 610                                     | 16800            | $2.78 \pm 0.26$                          |
| 296         | 25             | 10                 | 804                      | 0.81–5.8        | 642                                     | 18700            | $2.93 \pm 0.16$                          |
| 296         | 25             | 5                  | 575                      | 3.0             | 447                                     | 14600            | $3.13 \pm 0.20$                          |
| 296         | 25             | 6                  | 401                      | 1.0             | 686                                     | 19500            | $2.86 \pm 0.11$                          |
| 296         | 25             | 6                  | 2120                     | 6.9             | 704                                     | 17700            | $2.54 \pm 0.04$                          |
| 296         | 25             | 4                  | 590                      | 2.4             | 678                                     | 20700            | $3.02 \pm 0.07$                          |
| 296         | 25             | 5                  | 1170                     | 4.3             | 672                                     | 20700            | $3.08 \pm 0.08$                          |
| $297 \pm 1$ | $25.5 \pm 0.5$ | 81                 |                          |                 |                                         |                  | $3.00 \pm 0.13$ <sup>d</sup>             |
| 296         | 200            | 6                  | 797                      | 6.1             | 530                                     | 15000            | $2.90 \pm 0.15$                          |
| 351         | 25             | 7                  | 953                      | 4.4             | 559                                     | 16400            | $2.89 \pm 0.13$                          |
| 403         | 100            | 5                  | 852                      | 3.1             | 688                                     | 19600            | $2.82 \pm 0.09$                          |
| 419         | 25             | 6                  | 615–1320                 | 1.9–3.5         | 507                                     | 14500            | $2.89 \pm 0.10$                          |

<sup>a</sup> Units are  $T$  (K);  $P$  (Torr); concentrations ( $10^{11} \text{ cm}^{-3}$ );  $k$  ( $\text{s}^{-1}$ );  $k_{\text{R1}}$  ( $10^{-10} \text{ cm}^3 \text{ molecule}^{-1} \text{ s}^{-1}$ ). <sup>b</sup> # exp = number of pseudo-first-order  $\text{Cl}(^2\text{P}_J)$  decay rates measured. <sup>c</sup> Uncertainties are  $2\sigma$ , precision only. <sup>d</sup> Data at one temperature and pressure combined into a single linear fit.

**Table S3: Kinetic Data for the reaction  $\text{Cl}(^2\text{P}_J) + (\text{CH}_3)_2\text{NH} \rightarrow \text{products (R2)}$  <sup>a</sup>**

| $T$ | $P$         | # exp <sup>b</sup> | $[\text{Cl}_2\text{CO}]$ | $[\text{Cl}]_0$ | $[(\text{CH}_3)_2\text{NH}]_{\text{max}}$ | $k_{\text{max}}$ | $k_{\text{R2}} \pm 2\sigma$ <sup>c</sup> |
|-----|-------------|--------------------|--------------------------|-----------------|-------------------------------------------|------------------|------------------------------------------|
| 296 | 25          | 4                  | 424                      | 2.1             | 393                                       | 16000            | $3.99 \pm 0.06$                          |
| 296 | 25          | 6                  | 1050                     | 2.7             | 511                                       | 18600            | $3.58 \pm 0.21$                          |
| 296 | 25          | 3                  | 2020                     | 6.5             | 434                                       | 15300            | $3.51 \pm 0.09$                          |
| 296 | 25          | 13                 |                          |                 |                                           |                  | $3.57 \pm 0.28$ <sup>d</sup>             |
| 296 | 101         | 6                  | 741–2320                 | 2.2–7.1         | 634                                       | 20200            | $3.53 \pm 0.12$                          |
| 296 | 99          | 8                  | 1260                     | 3.5             | 762                                       | 27500            | $3.72 \pm 0.27$                          |
| 296 | 100         | 10                 | 361–962                  | 1.7–4.0         | 574                                       | 21800            | $3.83 \pm 0.10$                          |
| 296 | $100 \pm 1$ | 24                 |                          |                 |                                           |                  | $3.74 \pm 0.15$ <sup>d</sup>             |
| 337 | 25          | 5                  | 666                      | 2.9             | 509                                       | 20900            | $4.11 \pm 0.13$                          |
| 364 | 25          | 4                  | 1080                     | 1.2             | 282                                       | 11800            | $4.17 \pm 0.13$                          |
| 435 | 25          | 7                  | 419–922                  | 1.2–3.9         | 443                                       | 17400            | $3.95 \pm 0.12$                          |
| 435 | 100         | 4                  | 848                      | 3.7             | 378                                       | 14300            | $3.77 \pm 0.02$                          |

<sup>a</sup> Units are  $T$  (K);  $P$  (Torr); concentrations ( $10^{11} \text{ cm}^{-3}$ );  $k$  ( $\text{s}^{-1}$ );  $k_{\text{R2}}$  ( $10^{-10} \text{ cm}^3 \text{ molecule}^{-1} \text{ s}^{-1}$ ). <sup>b</sup> # exp  $\equiv$  number of pseudo–first–order  $\text{Cl}(^2\text{P}_J)$  decay rates measured. <sup>c</sup> Uncertainties are  $2\sigma$ , precision only. <sup>d</sup> Data at one temperature and pressure combined into a single linear fit.

**Table S4: Kinetic Data for the reaction  $\text{Cl}(^2\text{P}_J) + (\text{CH}_3)_3\text{N} \rightarrow \text{products (R3)}$  <sup>a</sup>**

| $T$         | $P$            | # exp <sup>b</sup> | $[\text{Cl}_2\text{CO}]$ | $[\text{Cl}]_0$ | $[(\text{CH}_3)_3\text{N}]_{\text{max}}$ | $k_{\text{max}}$ | $k_{\text{R3}} \pm 2\sigma$ <sup>c</sup> |
|-------------|----------------|--------------------|--------------------------|-----------------|------------------------------------------|------------------|------------------------------------------|
| 274         | 26             | 5                  | 453                      | 1.7             | 518                                      | 18800            | $3.63 \pm 0.01$                          |
| 294         | 28             | 4                  | 427                      | 2.8             | 710                                      | 24300            | $3.44 \pm 0.10$                          |
| 294         | 24             | 8                  | 277–1000                 | 1.6–4.3         | 352                                      | 12000            | $3.46 \pm 0.18$                          |
| 298         | 25             | 7                  | 142–572                  | 1.3–5.2         | 694                                      | 27300            | $3.89 \pm 0.16$                          |
| 298         | 25             | 6                  | 317                      | 2.8             | 688                                      | 24500            | $3.51 \pm 0.08$                          |
| $296 \pm 2$ | $26 \pm 2$     | 25                 |                          |                 |                                          |                  | $3.64 \pm 0.15$ <sup>d</sup>             |
| 298         | 201            | 5                  | 609                      | 5.4             | 788                                      | 30900            | $3.98 \pm 0.14$                          |
| 298         | 399            | 5                  | 648                      | 5.7             | 596                                      | 21900            | $3.68 \pm 0.17$                          |
| 360         | 26             | 4                  | 288                      | 2.6             | 416                                      | 14400            | $3.44 \pm 0.07$                          |
| 418         | 200            | 4                  | 360                      | 3.2             | 564                                      | 21200            | $3.80 \pm 0.14$                          |
| 421         | 27             | 6                  | 294                      | 2.3             | 522                                      | 18500            | $3.50 \pm 0.09$                          |
| 421         | 26             | 12                 | 124–607                  | 1.1–5.0         | 584                                      | 22600            | $3.62 \pm 0.27$                          |
| 421         | $26.5 \pm 0.5$ | 18                 |                          |                 |                                          |                  | $3.57 \pm 0.20$ <sup>d</sup>             |

<sup>a</sup> Units are  $T$  (K);  $P$  (Torr); concentrations ( $10^{11} \text{ cm}^{-3}$ );  $k$  ( $\text{s}^{-1}$ );  $k_{\text{R3}}$  ( $10^{-10} \text{ cm}^3 \text{ molecule}^{-1} \text{ s}^{-1}$ ). <sup>b</sup> # exp  $\equiv$  number of pseudo–first–order  $\text{Cl}(^2\text{P}_J)$  decay rates measured. <sup>c</sup> Uncertainties are  $2\sigma$ , precision only. <sup>d</sup> Data at one temperature and pressure combined into a single linear fit.

**Table S5.** Electronic energies of reactants, intermediates and products (/Hartree), and relative energies including Zero Point Energies and spin-orbit corrections,  $\Delta$  ( $\text{kJ mol}^{-1}$ ), of stationary points on the potential energy surface of the  $\text{CH}_3\text{NH}_2 + \text{Cl}$  reaction.

| Species                  | MP2/cc-pVTZ                                                | CCSD(T)-F12a/aug-cc-pVTZ //<br>MP2/cc-pVTZ |
|--------------------------|------------------------------------------------------------|--------------------------------------------|
| $\text{CH}_3\text{NH}_2$ | -95.657700<br>(0.064934) <sup>a</sup>                      | -95.740211                                 |
| Cl                       | -459.643363                                                | -459.692305                                |
| PRE                      | -555.324596<br>(0.066683)<br>$\Delta = -53.7$ <sup>b</sup> | -555.4576578<br>$\Delta = -57.9$           |
| TSC                      | -555.298154<br>(0.062089)<br>$\Delta = 3.7$                | -555.4333397<br>$\Delta = -6.1$            |
| POST-C                   | -555.320087<br>(0.060657)<br>$\Delta = -57.7$              | -555.4531579<br>$\Delta = -61.9$           |
| $\text{CH}_2\text{NH}_2$ | -95.000420<br>(0.050966)                                   | -95.08056486                               |
| HCl                      | -460.309449<br>(0.006959)                                  | -460.3630335                               |
| PROD-C                   | $\Delta = -38.0$                                           | $\Delta = -44.0$                           |
| TSN                      | -555.300640<br>(0.059702)<br>$\Delta = -9.1$               | -555.438471<br>$\Delta = -25.9$            |
| POST-N                   | -555.309277<br>(0.059676)<br>$\Delta = -31.9$              | -555.44435<br>$\Delta = -41.4$             |
| $\text{CH}_3\text{NH}$   | -94.985892<br>(0.049819)                                   | -95.06878                                  |
| PROD-N                   | $\Delta = -2.9$                                            | $\Delta = -16.1$                           |

<sup>a</sup>Zero point energy (ZPE) in parentheses. <sup>b</sup> Energy difference incl. ZPE and spin-orbit correction in  $\text{kJ mol}^{-1}$ .

**Table S6.** Electronic energies of reactants, intermediates and products (/Hartree), and relative energies including Zero Point Energies and spin-orbit corrections,  $\Delta$  ( $\text{kJ mol}^{-1}$ ), of stationary points on the potential energy surface of the  $(\text{CH}_3)_2\text{NH} + \text{Cl}$  reaction.

| Species                    | MP2/cc-pVTZ                                                  | CCSD(T)-F12a/aug-cc-pVTZ //<br>MP2/cc-pVTZ |
|----------------------------|--------------------------------------------------------------|--------------------------------------------|
| $(\text{CH}_3)_2\text{NH}$ | -134.8695333<br>(0.0936274) <sup>a</sup>                     | -134.9860964                               |
| Cl                         | -459.643363                                                  | -459.692305                                |
| PRE                        | -594.5434028<br>(0.0954794)<br>$\Delta = -71.7$ <sup>b</sup> | -594.7103488<br>$\Delta = -75.5$           |
| TSC                        | -594.5089551<br>(0.0903233)<br>$\Delta = 5.2$                | -594.6786317<br>$\Delta = -5.8$            |
| POST-C                     | -594.5341658<br>(0.0894522)<br>$\Delta = -63.3$              | -594.7016459<br>$\Delta = -68.5$           |
| $\text{CH}_2\text{NHCH}_3$ | -134.2125047<br>(0.0798803)                                  | -134.3274345                               |
| HCl                        | -460.309449<br>(0.006959)                                    | -460.3630335                               |
| PROD-C                     | $\Delta = -38.1$<br>-594.5219298                             | $\Delta = -46.0$<br>-594.6985662           |
| TSN                        | (0.0912015)<br>$\Delta = -26.6$                              | $\Delta = -55.8$                           |
| POST-N                     | -594.5309378<br>(0.0880082)<br>$\Delta = -58.6$              | -594.7011998<br>$\Delta = -71.1$           |
| $(\text{CH}_3)_2\text{N}$  | -134.2055925<br>(0.0784431)                                  | -134.3237353                               |
| PROD-N                     | $\Delta = -23.7$                                             | $\Delta = -40.1$                           |

<sup>a</sup>Zero point energy (ZPE) in parentheses. <sup>b</sup>Energy difference incl. ZPE and spin-orbit correction in  $\text{kJ mol}^{-1}$ .

**Table S7.** Electronic energies of reactants, intermediates and products (/Hartree), and relative energies including Zero Point Energies and spin-orbit corrections,  $\Delta$  ( $\text{kJ mol}^{-1}$ ), of stationary points on the potential energy surface of the  $(\text{CH}_3)_3\text{N} + \text{Cl}$  reaction.

| Species                     | MP2/cc-pVTZ                                     | CCSD(T*)-F12a/aug-cc-pVTZ //<br>MP2/cc-pVTZ |
|-----------------------------|-------------------------------------------------|---------------------------------------------|
| $(\text{CH}_3)_3\text{N}$   | -174.0867604<br>(0.12166688) <sup>a</sup>       | -174.236782                                 |
| Cl                          | -459.643363<br>-633.7651449                     | -459.692305<br>-633.9654206                 |
| PRE                         | (0.1238135)<br>$\Delta = -82.8$ <sup>b</sup>    | $\Delta = -86.3$                            |
| TSC                         | -633.7525668<br>(0.1162385)<br>$\Delta = -69.7$ | -633.9526191<br>$\Delta = -72.5$            |
| POST-C                      | -633.7527371<br>(0.1174582)<br>$\Delta = -66.9$ | -633.9533776<br>$\Delta = -71.3$            |
| $(\text{CH}_3)\text{NCH}_2$ | -173.4291449<br>(0.1082605)                     | -173.5782442                                |
| HCl                         | -460.309449<br>(0.006959)                       | -460.3630335                                |
| PROD-C                      | $\Delta = -35.7$                                | $\Delta = -45.4$                            |

<sup>a</sup>Zero point energy (ZPE) in parentheses. <sup>b</sup> Energy difference incl. ZPE and spin-orbit correction in  $\text{kJ mol}^{-1}$ .

**Table S8.** Cartesian coordinates of reactants, intermediates and products in the reactions between the Cl atom and CH<sub>3</sub>NH<sub>2</sub>, (CH<sub>3</sub>)<sub>2</sub>NH and (CH<sub>3</sub>)<sub>3</sub>N. Results from MP2/cc-pVTZ calculations.

| Species                                                   | Atom      | X         | Y         | Z         |
|-----------------------------------------------------------|-----------|-----------|-----------|-----------|
| HCl                                                       | H         | 0.000000  | 0.000000  | -1.202463 |
|                                                           | Cl        | 0.000000  | 0.000000  | 0.070733  |
| CH <sub>3</sub> NH <sub>2</sub>                           | C         | 0.051730  | 0.703644  | 0.000000  |
|                                                           | H         | 0.590539  | 1.059541  | 0.875164  |
|                                                           | H         | -0.937690 | 1.169764  | 0.000000  |
|                                                           | H         | 0.590539  | 1.059541  | -0.875164 |
|                                                           | N         | 0.051730  | -0.759486 | 0.000000  |
|                                                           | H         | -0.457937 | -1.097154 | 0.805857  |
|                                                           | H         | -0.457937 | -1.097154 | -0.805857 |
| CH <sub>3</sub> NH <sub>2</sub> *Cl Pre-reaction adduct   | C         | 1.702966  | -0.473362 | 0.000186  |
|                                                           | H         | 2.754401  | -0.182370 | 0.000348  |
|                                                           | H         | 1.493879  | -1.074800 | -0.878548 |
|                                                           | H         | 1.493647  | -1.074939 | 0.878770  |
|                                                           | N         | 0.808312  | 0.670333  | 0.000159  |
|                                                           | H         | 0.821983  | 1.236048  | -0.834408 |
|                                                           | H         | 0.821763  | 1.235916  | 0.834819  |
| Cl                                                        | -1.368333 | -0.117177 | -0.000189 |           |
| CH <sub>3</sub> NH <sub>2</sub> +Cl TSC                   | C         | 1.175375  | 0.616993  | 0.047145  |
|                                                           | H         | 1.266134  | 1.274640  | -0.812174 |
|                                                           | H         | 1.259835  | 1.197357  | 0.967643  |
|                                                           | H         | 0.097524  | 0.265994  | 0.030599  |
|                                                           | N         | 2.048294  | -0.515697 | -0.079084 |
|                                                           | H         | 2.265917  | -0.929366 | 0.814138  |
|                                                           | H         | 2.912843  | -0.272870 | -0.537739 |
| Cl                                                        | -1.717209 | -0.095755 | -0.011279 |           |
| CH <sub>2</sub> NH <sub>2</sub> *HCl Post-reaction adduct | C         | -1.434153 | 0.717006  | -0.000001 |
|                                                           | H         | -1.526653 | 1.265808  | 0.924347  |
|                                                           | H         | -1.526666 | 1.265817  | -0.924343 |
|                                                           | H         | 0.431928  | 0.375470  | 0.000000  |
|                                                           | N         | -1.948370 | -0.563547 | -0.000002 |
|                                                           | H         | -1.794885 | -1.102775 | -0.835650 |
|                                                           | H         | -1.794919 | -1.102759 | 0.835663  |
| Cl                                                        | 1.673806  | -0.062280 | 0.000000  |           |

|                                             |                                                                                     |    |           |           |           |
|---------------------------------------------|-------------------------------------------------------------------------------------|----|-----------|-----------|-----------|
| CH <sub>2</sub> NH <sub>2</sub>             | 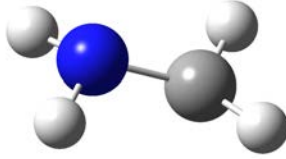   | C  | -0.725678 | -0.000001 | 0.083561  |
|                                             |                                                                                     | H  | -1.235530 | 0.925418  | -0.125777 |
|                                             |                                                                                     | H  | -1.235521 | -0.925393 | -0.125812 |
|                                             |                                                                                     | N  | 0.655111  | 0.000000  | -0.102293 |
|                                             |                                                                                     | H  | 1.119706  | 0.827807  | 0.233124  |
|                                             |                                                                                     | H  | 1.119633  | -0.827830 | 0.233152  |
| CH <sub>3</sub> NH <sub>2</sub> +Cl TSN     |    | C  | -1.783693 | -0.476203 | 0.016820  |
|                                             |                                                                                     | H  | -2.837900 | -0.201747 | 0.086711  |
|                                             |                                                                                     | H  | -1.523066 | -1.034698 | 0.916113  |
|                                             |                                                                                     | H  | -1.629930 | -1.102309 | -0.855156 |
|                                             |                                                                                     | N  | -1.014506 | 0.737338  | -0.120418 |
|                                             |                                                                                     | H  | -1.018824 | 1.267640  | 0.748623  |
|                                             |                                                                                     | H  | 0.123141  | 0.543912  | -0.420679 |
|                                             |                                                                                     | Cl | 1.452369  | -0.104526 | 0.015670  |
| CH <sub>3</sub> NH*HCl Post-reaction adduct |   | C  | -2.123473 | -0.473268 | -0.000001 |
|                                             |                                                                                     | H  | -2.775471 | -0.457511 | -0.877595 |
|                                             |                                                                                     | H  | -2.775429 | -0.457534 | 0.877625  |
|                                             |                                                                                     | H  | -1.545614 | -1.392039 | -0.000024 |
|                                             |                                                                                     | N  | -1.243095 | 0.664007  | 0.000001  |
|                                             |                                                                                     | H  | -1.804331 | 1.514459  | -0.000006 |
|                                             |                                                                                     | H  | 0.513374  | 0.344812  | 0.000002  |
|                                             |                                                                                     | Cl | 1.754704  | -0.080037 | 0.000000  |
| CH <sub>3</sub> NH                          |  | C  | -0.629099 | -0.012896 | 0.000005  |
|                                             |                                                                                     | H  | -0.963037 | -0.577039 | 0.876298  |
|                                             |                                                                                     | H  | -0.963050 | -0.577099 | -0.876251 |
|                                             |                                                                                     | H  | -1.122094 | 0.954681  | -0.000070 |
|                                             |                                                                                     | N  | 0.803534  | 0.152298  | 0.000005  |
|                                             |                                                                                     | H  | 1.198036  | -0.789257 | -0.000046 |
| (CH <sub>3</sub> ) <sub>2</sub> NH          |  | C  | -1.199934 | -0.225626 | 0.020344  |
|                                             |                                                                                     | H  | -1.231970 | -0.774751 | 0.970986  |
|                                             |                                                                                     | H  | -1.256576 | -0.957553 | -0.784743 |
|                                             |                                                                                     | H  | -2.082345 | 0.407197  | -0.043691 |
|                                             |                                                                                     | N  | 0.000000  | 0.577311  | -0.152494 |
|                                             |                                                                                     | H  | 0.000000  | 1.316543  | 0.538224  |
|                                             |                                                                                     | C  | 1.199934  | -0.225626 | 0.020344  |
|                                             |                                                                                     | H  | 1.256576  | -0.957553 | -0.784743 |
|                                             |                                                                                     | H  | 2.082345  | 0.407197  | -0.043690 |
|                                             |                                                                                     | H  | 1.231970  | -0.774751 | 0.970986  |



(CH<sub>3</sub>)<sub>2</sub>NH\*Cl Pre-reaction adduct

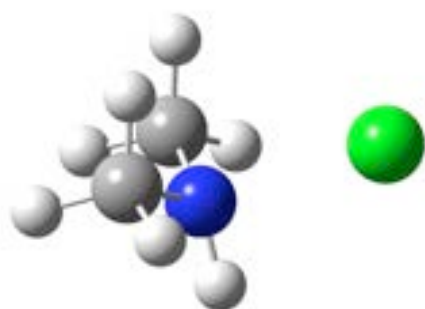

|    |           |           |           |
|----|-----------|-----------|-----------|
| C  | 1.188107  | 1.231454  | 0.145511  |
| H  | 2.266925  | 1.317551  | -0.011947 |
| H  | 0.979287  | 1.240967  | 1.212243  |
| H  | 0.679913  | 2.073664  | -0.312799 |
| N  | 0.666380  | 0.000000  | -0.409335 |
| H  | 0.590055  | 0.000000  | -1.416328 |
| Cl | -1.609661 | 0.000000  | 0.044738  |
| C  | 1.188106  | -1.231455 | 0.145511  |
| H  | 0.979284  | -1.240968 | 1.212243  |
| H  | 0.679911  | -2.073664 | -0.312800 |
| H  | 2.266924  | -1.317553 | -0.011946 |

(CH<sub>3</sub>)<sub>2</sub>NH+Cl TSC

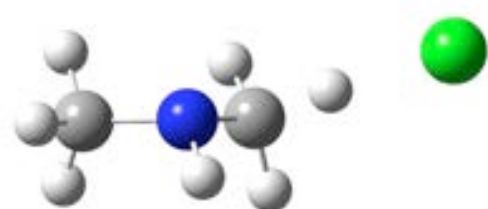

|    |           |           |           |
|----|-----------|-----------|-----------|
| C  | 0.473323  | 0.668568  | 0.154546  |
| H  | 0.631770  | 1.262271  | -0.742810 |
| H  | 0.467001  | 1.316466  | 1.037088  |
| H  | -0.604318 | 0.291190  | 0.075391  |
| N  | 1.364022  | -0.446189 | 0.179792  |
| H  | 1.362712  | -0.883823 | 1.090083  |
| C  | 2.723574  | -0.114958 | -0.226683 |
| H  | 3.343662  | -1.005753 | -0.164397 |
| H  | 2.712607  | 0.212230  | -1.264831 |
| H  | 3.188020  | 0.675566  | 0.373945  |
| Cl | -2.342999 | -0.121558 | -0.072364 |

CH<sub>3</sub>NHCH<sub>2</sub>\*HCl Post-reaction adduct

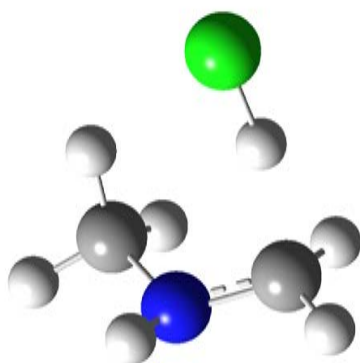

|    |           |           |           |
|----|-----------|-----------|-----------|
| C  | 0.815778  | 1.225271  | -0.251267 |
| H  | 0.975669  | 1.250067  | -1.320396 |
| H  | 0.665045  | 2.164599  | 0.259883  |
| H  | -0.847319 | 0.511057  | -0.167971 |
| N  | 1.526501  | 0.271466  | 0.430888  |
| H  | 1.375813  | 0.254220  | 1.427150  |
| C  | 1.725791  | -1.029568 | -0.178963 |
| H  | 2.455110  | -1.592640 | 0.396423  |
| H  | 0.798515  | -1.601464 | -0.244642 |
| H  | 2.117965  | -0.885602 | -1.183205 |
| Cl | -1.969160 | -0.186748 | 0.023407  |

CH<sub>3</sub>NHCH<sub>2</sub>

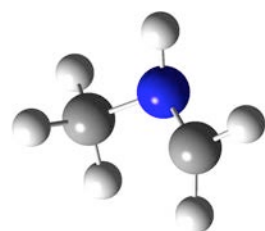

|   |           |           |           |
|---|-----------|-----------|-----------|
| C | -1.179119 | -0.188323 | 0.035508  |
| H | -1.986185 | 0.467966  | -0.280014 |
| H | -1.358291 | -0.502457 | 1.067435  |
| H | -1.199770 | -1.074383 | -0.596156 |
| N | 0.093827  | 0.480858  | -0.142957 |
| C | 1.241203  | -0.255861 | 0.088499  |
| H | 1.220456  | -1.281238 | -0.246133 |
| H | 2.175133  | 0.280836  | 0.062128  |
| H | 0.119360  | 1.408373  | 0.249401  |

(CH<sub>3</sub>)<sub>2</sub>NH+Cl TSN

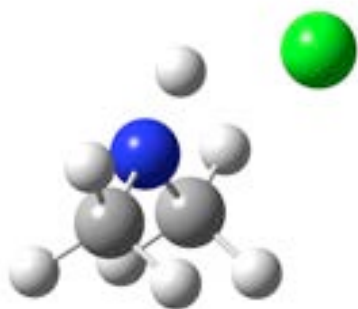

|    |           |           |           |
|----|-----------|-----------|-----------|
| C  | 0.099792  | 1.233007  | 1.228113  |
| H  | -0.080670 | 2.305122  | 1.327128  |
| H  | 1.177047  | 1.062077  | 1.228523  |
| H  | -0.347476 | 0.704092  | 2.062089  |
| N  | -0.499079 | 0.786896  | 0.000000  |
| H  | -0.898208 | -0.204644 | 0.000000  |
| Cl | 0.099792  | -1.661311 | 0.000000  |
| C  | 0.099792  | 1.233007  | -1.228113 |
| H  | 1.177047  | 1.062077  | -1.228523 |
| H  | -0.347476 | 0.704092  | -2.062089 |
| H  | -0.080670 | 2.305122  | -1.327128 |

(CH<sub>3</sub>)<sub>2</sub>N\*HCl Post-reaction adduct

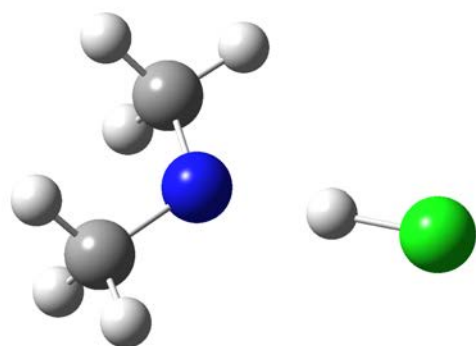

|    |           |           |           |
|----|-----------|-----------|-----------|
| C  | 1.665436  | 1.197055  | 0.000001  |
| H  | 2.314997  | 1.222989  | -0.880489 |
| H  | 2.315063  | 1.222955  | 0.880442  |
| H  | 1.025223  | 2.073589  | 0.000038  |
| N  | 0.873019  | 0.000002  | 0.000001  |
| H  | -0.822555 | 0.000003  | 0.000002  |
| Cl | -2.152015 | 0.000002  | 0.000000  |
| C  | 1.665424  | -1.197059 | -0.000001 |
| H  | 2.314997  | -1.222995 | 0.880480  |
| H  | 1.025203  | -2.073587 | -0.000026 |
| H  | 2.315039  | -1.222971 | -0.880451 |

(CH<sub>3</sub>)<sub>2</sub>N

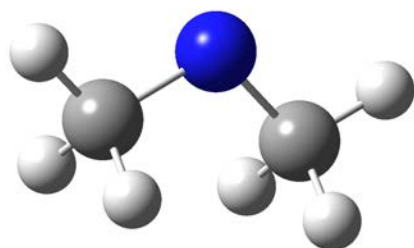

|   |           |           |           |
|---|-----------|-----------|-----------|
| C | -1.190467 | -0.175933 | -0.000013 |
| H | -2.092275 | 0.450755  | -0.000480 |
| H | -1.209125 | -0.835262 | 0.890742  |
| H | -1.208740 | -0.836191 | -0.890077 |
| N | 0.000000  | 0.650371  | -0.000033 |
| C | 1.190467  | -0.175934 | -0.000017 |
| H | 1.208648  | -0.836363 | -0.889955 |
| H | 2.092275  | 0.450755  | -0.000685 |
| H | 1.209217  | -0.835089 | 0.890864  |

(CH<sub>3</sub>)<sub>3</sub>N

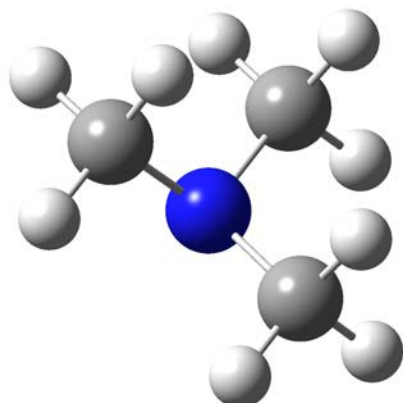

|   |           |           |           |
|---|-----------|-----------|-----------|
| C | -0.658798 | 1.203275  | 0.065529  |
| H | -0.689481 | 1.259320  | 1.165880  |
| H | -1.681646 | 1.232959  | -0.306033 |
| H | -0.132752 | 2.080984  | -0.306035 |
| N | -0.000001 | 0.000000  | -0.405852 |
| C | -0.712668 | -1.172173 | 0.065530  |
| H | -0.226951 | -2.072827 | -0.306035 |
| H | -0.745860 | -1.226769 | 1.165880  |
| H | -1.735810 | -1.155459 | -0.306034 |
| C | 1.371467  | -0.031102 | 0.065530  |
| H | 1.435343  | -0.032550 | 1.165880  |
| H | 1.868561  | -0.925526 | -0.306035 |
| H | 1.908596  | 0.839868  | -0.306036 |

(CH<sub>3</sub>)<sub>3</sub>N\*Cl Pre-reaction adduct N

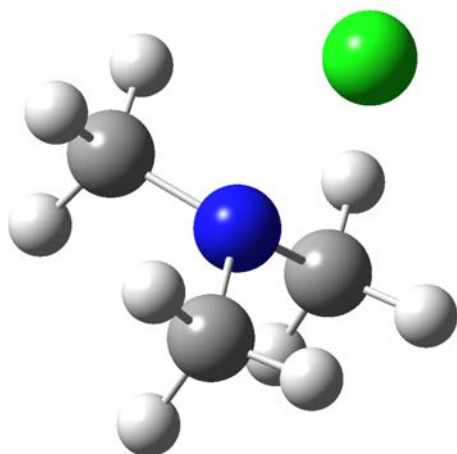

|    |           |           |           |
|----|-----------|-----------|-----------|
| C  | 0.933460  | 0.763384  | 1.177278  |
| H  | 2.023163  | 0.827999  | 1.277415  |
| H  | 0.515423  | 0.280619  | 2.056138  |
| H  | 0.515822  | 1.762851  | 1.094688  |
| N  | 0.569843  | -0.000050 | 0.000004  |
| C  | 0.935233  | -1.400695 | 0.072141  |
| H  | 0.518195  | -1.920955 | -0.785555 |
| H  | 2.025120  | -1.518398 | 0.078196  |
| H  | 0.518208  | -1.830088 | 0.978754  |
| C  | 0.933434  | 0.638385  | -1.249487 |
| H  | 2.023134  | 0.692363  | -1.355763 |
| H  | 0.515368  | 0.067881  | -2.074083 |
| H  | 0.515802  | 1.641051  | -1.270014 |
| Cl | -1.763053 | -0.000554 | 0.000036  |

(CH<sub>3</sub>)<sub>3</sub>N\*Cl Pre-reaction adduct 3H

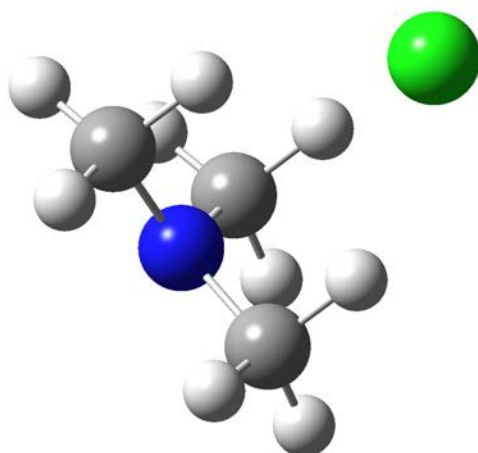

|    |           |           |           |
|----|-----------|-----------|-----------|
| C  | -0.946075 | 1.138356  | 0.808761  |
| H  | 0.175503  | 1.139217  | 0.809423  |
| H  | -1.322717 | 1.002577  | 1.816982  |
| H  | -1.322644 | 2.045753  | 0.348726  |
| N  | -1.244260 | 0.000010  | -0.000035 |
| C  | -0.946105 | -1.269595 | 0.581432  |
| H  | -1.322693 | -2.074856 | -0.040293 |
| H  | 0.175471  | -1.270595 | 0.581927  |
| H  | -1.322753 | -1.324893 | 1.597249  |
| C  | -0.945961 | 0.131253  | -1.390239 |
| H  | 0.175631  | 0.131336  | -1.391204 |
| H  | -1.322521 | -0.720829 | -1.946084 |
| H  | -1.322506 | 1.072312  | -1.776798 |
| Cl | 1.949876  | -0.000010 | 0.000035  |

(CH<sub>3</sub>)<sub>3</sub>N+Cl TSC

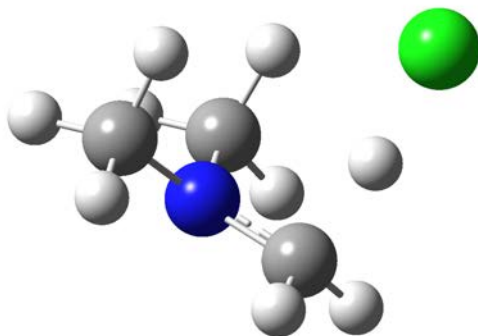

|    |           |           |           |
|----|-----------|-----------|-----------|
| C  | -0.953596 | -1.093874 | 1.223668  |
| H  | 0.120493  | -1.271776 | 1.324849  |
| H  | -1.479472 | -2.045198 | 1.199090  |
| H  | -1.298620 | -0.511679 | 2.073292  |
| N  | -1.224441 | -0.362896 | 0.000000  |
| C  | -0.953596 | -1.093874 | -1.223668 |
| H  | -1.298620 | -0.511679 | -2.073292 |
| H  | 0.120493  | -1.271776 | -1.324849 |
| H  | -1.479472 | -2.045198 | -1.199090 |
| C  | -0.953596 | 0.981926  | 0.000000  |
| H  | 0.469739  | 1.005210  | 0.000000  |
| H  | -1.213502 | 1.492897  | -0.920192 |
| H  | -1.213502 | 1.492897  | 0.920192  |
| Cl | 1.941663  | 0.790677  | 0.000000  |

(CH<sub>3</sub>)<sub>2</sub>NCH<sub>2</sub>\*Cl Post-reaction adduct

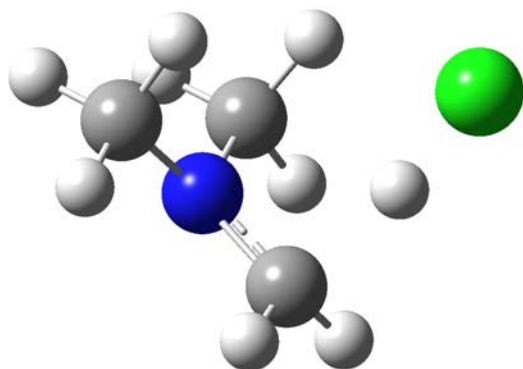

|    |           |           |           |
|----|-----------|-----------|-----------|
| C  | 1.366119  | 1.222291  | -0.528317 |
| H  | 0.501533  | 1.329155  | -1.189103 |
| H  | 2.273842  | 1.205073  | -1.127677 |
| H  | 1.401694  | 2.072937  | 0.146770  |
| N  | 1.278938  | -0.000001 | 0.246721  |
| C  | 1.366077  | -1.222333 | -0.528260 |
| H  | 1.401626  | -2.072948 | 0.146867  |
| H  | 0.501487  | -1.329199 | -1.189040 |
| H  | 2.273800  | -1.205171 | -1.127622 |
| C  | 0.463081  | 0.000039  | 1.345940  |
| H  | -1.028919 | 0.000027  | 0.607884  |
| H  | 0.438396  | -0.925006 | 1.906772  |
| H  | 0.438436  | 0.925107  | 1.906733  |
| Cl | -2.136831 | 0.000003  | -0.208518 |

(CH<sub>3</sub>)<sub>2</sub>NCH<sub>2</sub>

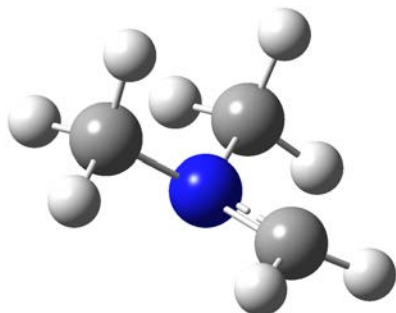

|   |           |           |           |
|---|-----------|-----------|-----------|
| C | -1.211557 | -0.655552 | 0.042247  |
| H | -1.319936 | -0.863875 | 1.113356  |
| H | -1.201039 | -1.600945 | -0.497190 |
| H | -2.072049 | -0.077645 | -0.286121 |
| N | 0.000000  | 0.081369  | -0.246154 |
| C | 1.211557  | -0.655552 | 0.042247  |
| H | 2.072049  | -0.077645 | -0.286120 |
| H | 1.319936  | -0.863875 | 1.113356  |
| H | 1.201040  | -1.600944 | -0.497191 |
| C | 0.000000  | 1.415078  | 0.101170  |
| H | 0.930037  | 1.945751  | -0.025496 |
| H | -0.930037 | 1.945751  | -0.025496 |

**Table S9.** Calculated wave numbers ( $\text{cm}^{-1}$ ) of the saddle points to H-abstraction in  $\text{CH}_3\text{NH}_2$ ,  $(\text{CH}_3)_2\text{NH}$  and  $(\text{CH}_3)_3\text{N}$  by Cl atoms. Results from MP2/cc-pVTZ calculations.

| $\text{CH}_3\text{NH}_2$ |      | $(\text{CH}_3)_2\text{NH}$ |      | $(\text{CH}_3)_3\text{N}$ |
|--------------------------|------|----------------------------|------|---------------------------|
| TSC                      | TSN  | TSC                        | TSN  | TSC                       |
| -318                     | -450 | -327                       | -447 | -309                      |
| 67                       | 130  | 50                         | 138  | 82                        |
| 125                      | 175  | 74                         | 161  | 98                        |
| 232                      | 612  | 204                        | 162  | 177                       |
| 695                      | 715  | 240                        | 233  | 202                       |
| 970                      | 948  | 394                        | 405  | 329                       |
| 1088                     | 1035 | 753                        | 510  | 410                       |
| 1164                     | 1060 | 970                        | 945  | 443                       |
| 1321                     | 1264 | 1032                       | 1043 | 518                       |
| 1327                     | 1401 | 1084                       | 1089 | 557                       |
| 1415                     | 1426 | 1136                       | 1098 | 858                       |
| 1490                     | 1473 | 1180                       | 1203 | 1021                      |
| 1659                     | 1502 | 1258                       | 1246 | 1064                      |
| 2179                     | 1520 | 1289                       | 1422 | 1079                      |
| 3078                     | 3056 | 1361                       | 1440 | 1108                      |
| 3186                     | 3128 | 1455                       | 1449 | 1135                      |
| 3576                     | 3198 | 1479                       | 1476 | 1141                      |
| 3680                     | 3523 | 1509                       | 1495 | 1155                      |
|                          |      | 1513                       | 1498 | 1194                      |
|                          |      | 1536                       | 1522 | 1354                      |
|                          |      | 1998                       | 2689 | 1434                      |
|                          |      | 3022                       | 3060 | 1440                      |
|                          |      | 3046                       | 3061 | 1465                      |
|                          |      | 3127                       | 3134 | 1491                      |
|                          |      | 3168                       | 3134 | 1498                      |
|                          |      | 3176                       | 3210 | 1511                      |
|                          |      | 3592                       | 3210 | 1514                      |
|                          |      |                            |      | 1560                      |
|                          |      |                            |      | 3053                      |
|                          |      |                            |      | 3055                      |
|                          |      |                            |      | 3133                      |
|                          |      |                            |      | 3152                      |
|                          |      |                            |      | 3153                      |
|                          |      |                            |      | 3195                      |
|                          |      |                            |      | 3197                      |
|                          |      |                            |      | 3245                      |

**Table S10.** Calculated rate coefficients ( $/10^{-10} \text{ cm}^3 \text{ molecule}^{-1} \text{ s}^{-1}$ ) and branching ratios for the Cl atom reaction with  $\text{CH}_3\text{NH}_2$ ,  $(\text{CH}_3)_2\text{NH}$  and  $(\text{CH}_3)_3\text{N}$ .

| T/K | $\text{CH}_3\text{NH}_2$ |                               | $(\text{CH}_3)_2\text{NH}$ |                               | $(\text{CH}_3)_3\text{N}$ |
|-----|--------------------------|-------------------------------|----------------------------|-------------------------------|---------------------------|
|     | $k_{\text{tot}}$         | $k_{\text{C}}/k_{\text{tot}}$ | $k_{\text{tot}}$           | $k_{\text{C}}/k_{\text{tot}}$ | $k_{\text{tot}}$          |
| 200 | 4.11                     | 0.06                          | 4.43                       | 0.00                          | 4.53                      |
| 210 | 4.12                     | 0.06                          | 4.45                       | 0.00                          | 4.55                      |
| 220 | 4.12                     | 0.06                          | 4.47                       | 0.00                          | 4.57                      |
| 230 | 4.13                     | 0.07                          | 4.49                       | 0.00                          | 4.59                      |
| 240 | 4.13                     | 0.07                          | 4.51                       | 0.00                          | 4.61                      |
| 250 | 4.14                     | 0.07                          | 4.53                       | 0.00                          | 4.63                      |
| 260 | 4.14                     | 0.08                          | 4.55                       | 0.00                          | 4.66                      |
| 270 | 4.15                     | 0.08                          | 4.58                       | 0.00                          | 4.68                      |
| 280 | 4.15                     | 0.08                          | 4.60                       | 0.00                          | 4.70                      |
| 290 | 4.16                     | 0.09                          | 4.62                       | 0.00                          | 4.72                      |
| 300 | 4.16                     | 0.09                          | 4.64                       | 0.00                          | 4.74                      |
| 310 | 4.16                     | 0.09                          | 4.66                       | 0.00                          | 4.76                      |
| 320 | 4.17                     | 0.10                          | 4.68                       | 0.00                          | 4.78                      |
| 330 | 4.17                     | 0.10                          | 4.70                       | 0.00                          | 4.80                      |
| 340 | 4.17                     | 0.10                          | 4.71                       | 0.00                          | 4.82                      |
| 350 | 4.17                     | 0.11                          | 4.73                       | 0.00                          | 4.84                      |
| 360 | 4.18                     | 0.11                          | 4.75                       | 0.00                          | 4.86                      |
| 370 | 4.18                     | 0.11                          | 4.77                       | 0.00                          | 4.88                      |
| 380 | 4.18                     | 0.12                          | 4.79                       | 0.00                          | 4.90                      |
| 390 | 4.18                     | 0.12                          | 4.80                       | 0.00                          | 4.92                      |
| 400 | 4.18                     | 0.13                          | 4.82                       | 0.00                          | 4.94                      |
| 410 | 4.18                     | 0.13                          | 4.84                       | 0.00                          | 4.96                      |
| 420 | 4.18                     | 0.13                          | 4.85                       | 0.00                          | 4.97                      |
| 430 | 4.18                     | 0.14                          | 4.87                       | 0.00                          | 4.99                      |
| 440 | 4.18                     | 0.14                          | 4.88                       | 0.00                          | 5.01                      |
| 450 | 4.18                     | 0.15                          | 4.90                       | 0.00                          | 5.03                      |
| 460 | 4.18                     | 0.15                          | 4.91                       | 0.00                          | 5.04                      |
| 470 | 4.17                     | 0.16                          | 4.93                       | 0.00                          | 5.06                      |
| 480 | 4.17                     | 0.16                          | 4.94                       | 0.00                          | 5.08                      |
| 490 | 4.17                     | 0.17                          | 4.96                       | 0.00                          | 5.09                      |
| 500 | 4.17                     | 0.17                          | 4.97                       | 0.00                          | 5.11                      |
| 510 | 4.17                     | 0.17                          | 4.98                       | 0.00                          | 5.12                      |
| 520 | 4.17                     | 0.18                          | 5.00                       | 0.00                          | 5.14                      |
| 530 | 4.17                     | 0.18                          | 5.01                       | 0.00                          | 5.15                      |
| 540 | 4.16                     | 0.19                          | 5.02                       | 0.00                          | 5.17                      |
| 550 | 4.16                     | 0.19                          | 5.03                       | 0.00                          | 5.18                      |
| 560 | 4.16                     | 0.20                          | 5.05                       | 0.00                          | 5.19                      |
| 570 | 4.16                     | 0.20                          | 5.06                       | 0.00                          | 5.21                      |
| 580 | 4.16                     | 0.21                          | 5.07                       | 0.00                          | 5.22                      |
| 590 | 4.15                     | 0.21                          | 5.08                       | 0.00                          | 5.24                      |
| 600 | 4.15                     | 0.22                          | 5.09                       | 0.00                          | 5.25                      |
